# Supplementary material for: Transcriptional profiling of wheat (Triticum aestivum L.) during a compatible interaction with the cereal cyst nematode Heterodera avenae
Source: PubMed Central journal article supplement (PMC6379437; doi:10.1038/s41598-018-37824-9), 2019-02-18
Supplement: 41598_2018_37824_MOESM1_ESM.pdf [file 41598_2018_37824_MOESM1_ESM.pdf]

Transcriptional profiling of wheat (*Triticum aestivum* L.) during a compatible interaction with the cereal cyst nematode *Heterodera avenae*

Fen Qiao<sup>1#</sup>, Ling-An Kong<sup>1#</sup>, Huan Peng<sup>1</sup>, Wen-Kun Huang<sup>1</sup>, Du-Qing Wu<sup>1</sup>, Shi-Ming Liu<sup>1</sup>, Jihong Liu Clarke<sup>2</sup>, De-Wen Qiu<sup>1</sup>, De-Liang Peng<sup>1\*</sup>.

### Supplementary Tables

**Table S1:** Gene expression analyses of Wen19 in response to CCN by RNA-Seq. Differentially expressed genes (DEGs) between non-infected and infected Wen19 at 1dpi, 3dpi and 8dpi were listed

| CCN response and control | No. of clean Reads | No. of DEGs | No. of DEGs up-regulated | No. of DEGs down-regulated |
|--------------------------|--------------------|-------------|--------------------------|----------------------------|
| 1 dpi                    | 214,092,190        | 3649        | 2513                     | 1136                       |
| 3 dpi                    | 215,995,184        | 6029        | 4467                     | 1562                       |
| 8 dpi                    | 215,455,900        | 1251        | 945                      | 306                        |
| total                    | 645,543,274        | 10929       | 7925                     | 3004                       |

**Table S2:** Genes greatly up/down-regulated of infected Wen19 compared to the non-infected at 1dpi, 3dpi and 8dpi. FC: fold change (CCN infected vs non-infected samples); --: not found.

| Wheat-ID               | Swissprot-annotation                                             | Log <sub>2</sub> FC | Pathway                                      |
|------------------------|------------------------------------------------------------------|---------------------|----------------------------------------------|
| <b>1dpi</b>            |                                                                  |                     |                                              |
| Traes_5DL_7CC241DA0.1  | Aromatic-L-amino-acid decarboxylase                              | 13.1333             | tyrosine decarboxylase                       |
| Traes_4AL_2B70B04B6.2  | Beta-sesquiphellandrene synthase                                 | 12.3512             | beta-farnesene synthase                      |
| Traes_1BL_E5E8D9BC9.1  | Formin-like protein 8                                            | 12.1639             | solute carrier family 39                     |
| Traes_3B_8036ADEB6.1   | Probable linoleate 9S-lipoxygenase 4                             | 11.2279             | response to JA stimulus                      |
| Traes_4AS_19FA06316.1  | Nodulation-signaling pathway 2 protein                           | 11.4278             | regulation of transcription                  |
| Traes_4DS_CA2D872D6.1  | UDP-glycosyltransferase 91B1                                     | 10.6547             | metabolic process                            |
| Traes_5DL_91AE6CA271.4 | Dehydration-responsive element-binding protein 1H                | -10.5458            | regulation of transcription                  |
| Traes_1AL_65A99675F.1  | Senescence-induced receptor-like serine/threonine-protein kinase | -10.2126            | --                                           |
| <b>3dpi</b>            |                                                                  |                     |                                              |
| Traes_2DS_1063CD755.1  | Probable glutathione S-transferase GSTF1                         | 12.7813             | glutathione S-transferase                    |
| Traes_4BL_98B0C2E78.1  | Bidirectional sugar transporter SWEET12                          | 12.6425             | solute carrier family 50                     |
| Traes_2DS_D2EF60FE1.3  | Ethylene-responsive transcription factor RAP2-2                  | 11.675              | --                                           |
| Traes_6DL_6EC763C47.1  | Peptide transporter PTR2                                         | 10.5579             | transport                                    |
| Traes_5DL_C65153D64.1  | indole-2-monooxygenase                                           | 10.7533             | oxidation-reduction process                  |
| Traes_3B_82E1F5484.1   | Ethylene-responsive transcription factor TINY                    | -11.2707            | EREBP-like factor                            |
| Traes_6DS_D1697BDF3.1  | Transcription factor HY5                                         | -9.4566             | ABA responsive element binding factor        |
| Traes_1AL_CC827E5C6.1  | Phytochrome-associated serine/threonine-protein phosphatase      | -8.2095             | protein dephosphorylation;                   |
| <b>8dpi</b>            |                                                                  |                     |                                              |
| Traes_1AL_F18C11AB1.1  | Cytosolic sulfotransferase 12                                    | 12.6623             | desulfoglucosinolate sulfotransferase A/B/C  |
| Traes_2BL_9AB7B773F.1  | Vegetative cell wall protein gp1                                 | 12.1175             | phospholipase D                              |
| Traes_7DL_8650816CA.2  | Proline-rich receptor-like protein kinase PERK10                 | 11.5405             | ataxia telangiectasia mutated family protein |
| Traes_1AL_258E7F2A3.1  | ethylene responsive transcription factor                         | 10.2378             | regulation of transcription                  |
| Traes_4DL_7A2335529.2  | uncharacterized protein                                          | -10.5519            | --                                           |
| Traes_1DL_E2E9F90E4.2  | Beta-galactosidase 7                                             | -3.0598             | carbohydrate metabolic process               |
| Traes_4BL_10B3124F1.1  | Elongation factor 1-alpha C                                      | -4.3825             | translational elongation process             |

**Table S3:** Expression levels of genes for respiratory burst oxidase and antioxidant enzyme genes in the infected Wen19 compared to the non-infected at 1dpi, 3 dpi and 8 dpi by RNA-seq. FC: fold change (CCN infected vs non-infected samples); --: not differentially expressed.

| Wheat-ID                  | log <sub>2</sub> FC<br>1dpi | log <sub>2</sub> FC<br>3dpi | log <sub>2</sub> FC<br>8dpi | Swissprot-annotation                                                           |
|---------------------------|-----------------------------|-----------------------------|-----------------------------|--------------------------------------------------------------------------------|
| respiratory burst oxidase |                             |                             |                             |                                                                                |
| Traes_1DL_0C3B0EA5C.1     | 1.4745                      | 1.3092                      | -1.3179                     | Respiratory burst oxidase homolog protein<br>[ <i>Arabidopsis thaliana</i> ]   |
| Traes_5BL_CF34FCA90.3     | --                          | 1.5787                      | --                          | Respiratory burst oxidase homolog protein C<br>[ <i>Arabidopsis thaliana</i> ] |
| Traes_1AL_D25D2A8D7.2     | 2.9663                      | 2.6897                      | 2.6283                      | Respiratory burst oxidase homolog protein D<br>[ <i>Arabidopsis thaliana</i> ] |
| Traes_1DL_5B3CEB047.1     | 2.1291                      | 11.254                      | 3.3257                      | Respiratory burst oxidase homolog protein B<br>[ <i>Arabidopsis thaliana</i> ] |
| Traes_5DS_2809B6F77.4     | --                          | 2.7678                      | --                          | Respiratory burst oxidase homolog protein B<br>[ <i>Arabidopsis thaliana</i> ] |
| Traes_5DS_2809B6F77.4     | --                          | 2.5263                      | --                          | Respiratory burst oxidase homolog protein B<br>[ <i>Arabidopsis thaliana</i> ] |
| Traes_5BL_CF34FCA90.1     | --                          | 1.5687                      | --                          | Respiratory burst oxidase homolog protein D<br>[ <i>Arabidopsis thaliana</i> ] |
| Traes_5DS_2809B6F77.3     | --                          | 3.1171                      | --                          | Respiratory burst oxidase homolog protein B<br>[ <i>Arabidopsis thaliana</i> ] |
| antioxidant enzymes       |                             |                             |                             |                                                                                |
| Traes_5BS_BA048F803.1     | 2.4348                      | 10.4995                     | --                          | Peroxidase [ <i>Triticum aestivum</i> ]                                        |
| Traes_2BL_A25152F2A.1     | 1.1543                      | 2.0879                      | --                          | Peroxidase 70 OS=Zea mays GN=PER70<br>PE=1 SV=3                                |
| Traes_2BL_A25152F2A.1     | 1.4658                      | 4.2906                      | 1.8623                      | Peroxidase 52 [ <i>Arabidopsis thaliana</i> ]                                  |
| Traes_1DS_103FB69FD.1     | 2.6368                      | 4.9846                      | 2.5444                      | Peroxidase 5 [ <i>Vitis vinifera</i> ]                                         |
| Traes_4DS_0B056789B.2     | 3.6234                      | 3.3004                      | 1.7683                      | Peroxidase 4 [ <i>Vitis vinifera</i> ]                                         |
| Traes_2BL_A25152F2A.2     | 1.1907                      | 4.852                       | 1.6419                      | Peroxidase 2 [ <i>Oryza sativa</i> subsp. Japonica]                            |
| Traes_3AL_EB37D49001.1    | 3.2131                      | 2.2517                      | 1.493                       | Peroxidase 15 [ <i>Ipomoea batatas</i> ]                                       |
| Traes_2DL_FFB73A9AD.1     | 4.7429                      | 2.333                       | --                          | Cationic peroxidase SPC4 [ <i>Sorghum bicolor</i> ]                            |
| Traes_6DS_3522B8EF6.1     | 1.0087                      | 1.5313                      | --                          | Catalase isozyme 2 [ <i>Hordeum vulgare</i> ]                                  |
| Traes_2DL_F2EBB4B14.1     | 2.8716                      | 1.6859                      | -1.3189                     | Peroxidase 56 [ <i>Arabidopsis thaliana</i> ]                                  |
| Traes_1BS_BA046E212.1     | -2.5092                     | 2.5995                      | 1.9563                      | Peroxidase 54 [ <i>Arabidopsis thaliana</i> ]                                  |
| Traes_4AL_89CCB25EA.1     | -3.0777                     | -1.5909                     | 1.2907                      | Peroxidase 2 [ <i>Zea mays</i> ]                                               |
| Traes_2DL_1C4C67BC8.1     | 1.9136                      | 1.6992                      | --                          | Peroxidase 12 [ <i>Arabidopsis thaliana</i> ]                                  |
| Traes_7DL_6EFFDA6D1.1     | 1.3741                      | 2.4277                      | --                          | --                                                                             |
| Traes_5BL_04D10C4E7.1     | 2.3112                      | 11.0018                     | --                          | L-ascorbate oxidase [ <i>Cucurbita pepo</i> var.<br>melopepo]                  |
| Traes_2DL_A55995202.2     | 8.0482                      | 11.2121                     | --                          | Anthocyanidin reductase [ <i>Arabidopsis thaliana</i> ]                        |
| Traes_7AL_4842B84BF.2     | --                          | 2.1176                      | 1.0148                      | Anthocyanidin reductase [ <i>Arabidopsis thaliana</i> ]                        |

**Table S4:** Expression levels of UDP-glucosyltransferase and glutathione S-transferases (GST) genes in the infected Wen19 compared to the non-infected at 1dpi, 3 dpi and 8 dpi by RNA-seq. FC: fold change (CCN infected vs non-infected samples); --: not differentially expressed.

| Wheat-ID                         | log <sub>2</sub> FC<br>1dpi | log <sub>2</sub> FC<br>3dpi | log <sub>2</sub> FC<br>8dpi | Swissprot-annotation                                         |
|----------------------------------|-----------------------------|-----------------------------|-----------------------------|--------------------------------------------------------------|
| UDP-glucosyltransferase          |                             |                             |                             |                                                              |
| Traes_5BL_78AFC51C81.2           | 11.7396                     | 11.4498                     | 1.4929                      | UDP-glucosyltransferase [ <i>Arabidopsis thaliana</i> ]      |
| Traes_2DS_DBE32D98B.1            | 6.1412                      | 7.5069                      | 1.4879                      | UDP-glucosyltransferase [ <i>Arabidopsis thaliana</i> ]      |
| Traes_6DS_EC682031E.1            | 2.2077                      | 4.1919                      | --                          | UDP-glycosyltransferase 85A5 [ <i>Arabidopsis thaliana</i> ] |
| Traes_5DS_19AE064C1.1            | 2.121                       | 3.5311                      | --                          | UDP-glycosyltransferase 74E1 [ <i>Arabidopsis thaliana</i> ] |
| Traes_5AL_BCA187DFF.1            | 1.5686                      | 1.3604                      | --                          | UDP-glycosyltransferase 74E2 [ <i>Arabidopsis thaliana</i> ] |
| Traes_4DS_CA2D872D6.1            | 1.3333                      | 2.8595                      | --                          | UDP-glycosyltransferase 91C1 [ <i>Arabidopsis thaliana</i> ] |
| Traes_6DL_4AC316C93.1            | 1.3332                      | 3.0433                      | --                          | UDP-glycosyltransferase 85A1 [ <i>Arabidopsis thaliana</i> ] |
| Traes_3B_A2CE643F8.1             | 1.2194                      | 1.6582                      | --                          | UDP-glycosyltransferase 73C5 [ <i>Arabidopsis thaliana</i> ] |
| Traes_2BS_48735B0CB.1            | 1.2076                      | 4.3534                      | -1.337                      | UDP-glycosyltransferase 76C2 [ <i>Arabidopsis thaliana</i> ] |
| Traes_5BL_DD0352E4C.1            | 1.182                       | 1.4972                      | --                          | UDP-glycosyltransferase 90A1 [ <i>Arabidopsis thaliana</i> ] |
| Traes_5BL_3C4FA0AE5.2            | 1.0513                      | 1.5491                      | --                          | UDP-glycosyltransferase 75D1 [ <i>Arabidopsis thaliana</i> ] |
| Traes_5DL_F1C1DEBBF.1            | --                          | 3.8594                      | 1.3999                      | UDP-glycosyltransferase 73B4 [ <i>Arabidopsis thaliana</i> ] |
| Traes_2BL_C6981594D.1            | --                          | 1.2747                      | --                          | UDP-glycosyltransferase 72B1 [ <i>Arabidopsis thaliana</i> ] |
| Traes_1AS_B486CB8E2.1            | --                          | 10.3536                     | 1.985                       | UDP-glycosyltransferase 85A3 [ <i>Arabidopsis thaliana</i> ] |
| Traes_6DL_E2E8047EE.1            | --                          | -1.1903                     | --                          | UDP-glycosyltransferase 85A2 [ <i>Arabidopsis thaliana</i> ] |
| glutathione S-transferases (GST) |                             |                             |                             |                                                              |
| Traes_1AL_CA2AFD745.1            | 4.1148                      | 2.8059                      | --                          | Probable GSTU6 [ <i>Oryza sativa</i> subsp. Japonica]        |
| Traes_1AL_C40703A29.1            | 3.0701                      | 1.4673                      | 2.0779                      | Probable GSTU6 [ <i>Oryza sativa</i> subsp. Japonica]        |
| Traes_5DL_58B23C5A4.3            | 2.977                       | 4.7771                      | 2.3581                      | GST 2 [ <i>Triticum aestivum</i> ]                           |
| Traes_4AL_347F5BB64.1            | 2.4487                      | 5.059                       | 2.1934                      | Probable GSTF2 [ <i>Oryza sativa</i> subsp. Japonica]        |
| Traes_5BL_2D1D16169.2            | 1.977                       | 2.5496                      | --                          | Probable GSTF1 [ <i>Oryza sativa</i> subsp. Japonica]        |
| Traes_7AS_B97EB9A75.1            | 1.9593                      | 2.8619                      | --                          | Probable GST [ <i>Nicotiana tabacum</i> ]                    |
| Traes_1DS_B686BC1E0.1            | 1.836                       | 3.0525                      | 2.2012                      | Probable GSTU6 [ <i>Oryza sativa</i> subsp. Japonica]        |
| Traes_3B_D47C46EC2.1             | 1.7179                      | 2.0955                      | --                          | GST 3 [ <i>Zea mays</i> ]                                    |
| Traes_2BS_26A877813.1            | 1.6552                      | 2.6898                      | 2.0779                      | Probable GSTU6 [ <i>Oryza sativa</i> subsp. Japonica]        |
| Traes_5BS_D1BA3D7D3.1            | 1.6117                      | 1.7701                      | --                          | GST 4 [ <i>Zea mays</i> ]                                    |
| Traes_2BL_54C69C35D.1            | 1.3181                      | 2.553                       | 1.2434                      | Probable GST [ <i>Nicotiana tabacum</i> ]                    |
| Traes_5BL_E956B149A.1            | 1.2831                      | 3.1047                      | --                          | GST 23 [ <i>Zea mays</i> ]                                   |
| Traes_3B_1B7EAAAB22.1            | --                          | 4.7483                      | 1.3735                      | GST 23 [ <i>Zea mays</i> ]                                   |
| Traes_2DS_1063CD755.1            | --                          | 12.7813                     | 2.0166                      | Probable GSTF1 [ <i>Oryza sativa</i> subsp. Japonica]        |
| Traes_1AL_2103C5913.1            | --                          | 1.4584                      | --                          | GST U17 [ <i>Arabidopsis thaliana</i> ]                      |
| Traes_5BL_6E5FBD11D.5            | --                          | 1.2816                      | --                          | GST [ <i>Triticum aestivum</i> ]                             |
| Traes_2DL_311457A3D.2            | --                          | 1.7162                      | --                          | GST U19 [ <i>Arabidopsis thaliana</i> ]                      |
| Traes_4AL_A06C88922.2            | --                          | 5.4338                      | 1.2895                      | Probable GSTU6 [ <i>Oryza sativa</i> subsp. Japonica]        |
| Traes_3DL_B781DEF97.1            | --                          | 1.3345                      | --                          | GST 1 [ <i>Zea mays</i> ]                                    |
| Traes_2AL_24740AC23.1            | --                          | 1.6706                      | --                          | GST 3 [ <i>Glycine max</i> ]                                 |
| Traes_5DL_D7DD6CA07.1            | --                          | -3.4019                     | --                          | GST [ <i>Arabidopsis thaliana</i> ]                          |
| Traes_3B_F1C4DE560.1             | --                          | 2.6073                      | 1.9322                      | Probable GST [ <i>Glycine max</i> ]                          |
| Traes_2DL_87838170E.1            | --                          | 3.0958                      | 1.0985                      | Probable GST [ <i>Nicotiana tabacum</i> ]                    |
| Traes_3DL_8D15D0EF8.1            | -1.5888                     | -1.3358                     | --                          | GST U8 [ <i>Arabidopsis thaliana</i> ]                       |

**Table S5:** Expression levels of NBS-LRR genes in the infected Wen19 compared to the non-infected at 1 dpi, 3 dpi and 8 dpi by RNA-seq. FC: fold change (CCN infected vs non-infected samples); --: not differentially expressed.

| Wheat-ID               | log <sub>2</sub> FC1<br>dpi | log <sub>2</sub> FC<br>3dpi | log <sub>2</sub> FC<br>8dpi | Nr-annotation                                                         |
|------------------------|-----------------------------|-----------------------------|-----------------------------|-----------------------------------------------------------------------|
| Traes_2BS_57256616B.4  | --                          | 3.275                       | 2.0782                      | NBS-LRR R protein [ <i>Hordeum vulgare</i> ]                          |
| Traes_6DL_165369544.1  | -1.9301                     | 1.8703                      | --                          | NBS-LRR R protein [ <i>Setaria italica</i> ]                          |
| Traes_7BS_9716221D5.1  | --                          | 1.6897                      | --                          | NBS-LRR type R protein [ <i>Cynodon magennisii</i> ]                  |
| Traes_5DL_51EF17022.3  | 1.6557                      | 1.5198                      | 1.2479                      | NBS-LRR R protein family-3 [ <i>Oryza brachyantha</i> ]               |
| Traes_2DL_FFC3E4F86.1  | --                          | 1.4671                      | 1.537                       | NBS-LRR R protein [ <i>Hordeum vulgare</i> ]                          |
| Traes_7BL_1C6415BB2.3  | --                          | -1.216                      | -1.5088                     | NBS-LRR-like protein [ <i>Hordeum vulgare</i> subsp. vulgare]         |
| Traes_2BS_26B28D804.1  | -1.5147                     | -1.8957                     | 1.815                       | NBS-LRR R protein [ <i>Hordeum vulgare</i> subsp. spontaneum]         |
| Traes_1AS_E6F253266.3  | --                          | -1.9828                     | -1.1443                     | NBS-LRR R protein [ <i>Hordeum vulgare</i> ]                          |
| Traes_1AS_E6F253266.2  | --                          | -2.0471                     | -1.1026                     | NBS-LRR R protein [ <i>Hordeum vulgare</i> ]                          |
| Traes_7AS_E43D64A80.6  | --                          | -2.2172                     | --                          | NBS-LRR resistance-like protein [ <i>Hordeum vulgare</i> ]            |
| Traes_6BS_27BE3E745.16 | --                          | -2.4572                     | --                          | NBS-LRR R protein [ <i>Hordeum vulgare</i> ]                          |
| Traes_2DL_ADACB74CD.2  | --                          | -2.4793                     | --                          | NBS-LRR R protein [ <i>Hordeum vulgare</i> ]                          |
| Traes_6BS_27BE3E745.4  | --                          | -2.7028                     | 1.2155                      | NBS-LRR R protein [ <i>Hordeum vulgare</i> ]                          |
| Traes_4AL_2DE434D73.4  | -1.1526                     | -3.0647                     | 1.2479                      | NBS-LRR-like protein [ <i>Hordeum vulgare</i> subsp. vulgare]         |
| Traes_7DS_A7A26AAA4.1  | 1.0087                      | -3.4184                     | --                          | NBS-LRR R protein [ <i>Hordeum vulgare</i> ]                          |
| Traes_2BS_E7B6E117A.1  | --                          | -4.5382                     | --                          | NBS-LRR type protein [ <i>Oryza sativa</i> Indica Group]              |
| Traes_1AS_860F1C549.1  | 1.0701                      | -9.9275                     | --                          | NBS-kinase-like protein [ <i>Secale strictum</i> subsp. kuprijanovii] |

**Table S6:** Expression levels of some genes in metabolic pathways in the infected Wen19 compared to the non-infected at 1dpi, 3 dpi and 8 dpi by RNA-seq. FC: fold change (CCN infection vs control samples); --: not differentially expressed.

| Wheat-ID              | log <sub>2</sub> FC<br>1dpi | log <sub>2</sub> FC<br>3dpi | log <sub>2</sub> FC<br>8dpi | Swissprot-annotation                                                |
|-----------------------|-----------------------------|-----------------------------|-----------------------------|---------------------------------------------------------------------|
| Traes_3DS_3D22DDF16.1 | -8.4355                     | -1.9308                     | --                          | Endoglucanase 12 [ <i>Oryza sativa</i> subsp. Japonica]             |
| Traes_6DS_204661A07.1 | -1.2577                     | -1.4007                     | --                          | Beta-fructofuranosidase 1 [ <i>Zea mays</i> ]                       |
| Traes_6DL_61AA02A3D.2 | -1.5493                     | -1.5592                     | --                          | Beta-D-xylosidase 3 [ <i>Arabidopsis thaliana</i> ]                 |
| Traes_3AL_DCFA76D6D.1 | 1.7024                      | 11.0614                     | 3.3997                      | class III chitinase [ <i>Bambusa oldhamii</i> ]                     |
| Traes_1BL_081C896A0.1 | 2.209                       | 2.2838                      | --                          | chitinase 2 precursor [ <i>Zea mays</i> ]                           |
| Traes_7AL_FAE816A85.1 | 2.4677                      | 2.8637                      | 1.3259                      | chitinase 2-like [ <i>Brachypodium distachyon</i> ]                 |
| Traes_1BL_081C896A0.1 | 1.8406                      | 2.4527                      | --                          | Chitinase [ <i>Oryza sativa</i> Japonica Group]                     |
| Traes_4AS_5535CF08E.1 | 1.392                       | 1.3876                      | --                          | Beta-glucosidase 6 [ <i>Oryza sativa</i> subsp. Japonica]           |
| Traes_2BS_2EDCB210E.3 | 10.8887                     | 8.7672                      | -8.1174                     | Beta-glucosidase 26 [ <i>Oryza sativa</i> subsp. Japonica]          |
| Traes_2AL_D3D671F67.3 | 1.2277                      | 1.1375                      | --                          | Beta-glucosidase 12 [ <i>Oryza sativa</i> subsp. Japonica]          |
| Traes_3B_EDFCBD301.1  | 2.1666                      | 13.2378                     | --                          | beta-1,3-glucanase precursor [ <i>Triticum aestivum</i> ]           |
| Traes_3B_EDFCBD301.1  | 1.4027                      | 12.5468                     | --                          | beta-1,3-glucanase 2a [ <i>Zea mays</i> ]                           |
| Traes_2DS_721623E22.1 | 0.0258                      | 2.6695                      | 1.636                       | Glucan endo-1,3-beta-glucosidase 7 [ <i>Arabidopsis thaliana</i> ]  |
| Traes_2BS_9C52B176E.4 | 0.4033                      | 2.3227                      | 1.0322                      | Glucan endo-1,3-beta-glucosidase 3 [ <i>Arabidopsis thaliana</i> ]  |
| Traes_2BS_9C52B176E.1 | 0.8826                      | 6.0705                      | 2.3003                      | Glucan endo-1,3-beta-glucosidase 13 [ <i>Arabidopsis thaliana</i> ] |
| Traes_4AL_9D7ECD3BA.1 | -1.1531                     | -1.1671                     | --                          | Long chain acyl-CoA synthetase 9 [ <i>Arabidopsis thaliana</i> ]    |
| Traes_5DS_DAF26AAD9.1 | 1.5677                      | 1.5555                      | --                          | 3-ketoacyl-CoA synthase 11 [ <i>Arabidopsis thaliana</i> ]          |
| Traes_3AS_77CBFA352.1 | 1.0701                      | 2.0242                      | --                          | GDSL esterase/lipase [ <i>Arabidopsis thaliana</i> ]                |
| Traes_2BL_424BDA37F.2 | 13.1333                     | 2.6898                      | --                          | Aromatic-L-amino-acid decarboxylase [ <i>Catharanthus roseus</i> ]  |
| Traes_7AL_0F8FA764F.1 | 6.0844                      | 4.9628                      | 2.3992                      | Aromatic-L-amino-acid decarboxylase [ <i>Catharanthus roseus</i> ]  |
| Traes_3B_32AE0BA64.1  | 3.6609                      | 2.2747                      | --                          | Tyrosine/DOPA decarboxylase 2 [ <i>Papaver somniferum</i> ]         |

**Table S7:** Expression levels of genes in transporter pathways in the infected Wen19 compared to the non-infected at 1dpi, 3 dpi and 8 dpi by RNA-seq. FC: fold change (CCN infection vs control samples); --: not differentially expressed.

| Wheat-ID              | log <sub>2</sub> FC<br>1dpi | log <sub>2</sub> FC<br>3dpi | log <sub>2</sub> FC<br>8dpi | Swissprot-annotation                                                              |
|-----------------------|-----------------------------|-----------------------------|-----------------------------|-----------------------------------------------------------------------------------|
| Traes_2BS_7DF366FE1.4 | 2.5985                      | 1.8073                      | --                          | Sugar transport protein 4 [ <i>Arabidopsis thaliana</i> ]                         |
| Traes_5AL_FC472994F.1 | --                          | 2.2257                      | 1.4766                      | Sugar carrier protein A [ <i>Ricinus communis</i> ]                               |
| Traes_5BL_3BD2C8DF3.2 | --                          | -1.2851                     | -1.0795                     | Non-specific lipid-transfer protein-like [ <i>Arabidopsis thaliana</i> ]          |
| Traes_4BL_82F5E9A41.1 | --                          | 2.4978                      | 1.3964                      | Non-specific lipid-transfer protein 4.3 [ <i>Hordeum vulgare</i> ]                |
| Traes_4AL_58F9FBC2E.1 | --                          | 2.2923                      | 1.537                       | Non-specific lipid-transfer protein 4 [ <i>Oryza sativa</i> subsp. Japonica]      |
| Traes_2AS_5884229E4.1 | -1.3622                     | --                          | --                          | Non-specific lipid transfer protein-like 1 [ <i>Oryza sativa</i> subsp. Japonica] |
| Traes_5BL_53FCAF30F.1 | 2.3332                      | 2.6282                      | --                          | Probable peptide/nitrate transporter [ <i>Arabidopsis thaliana</i> ]              |
| Traes_7DL_9E0C74527.2 | 1.2077                      | 3.031                       | --                          | Probable peptide/nitrate transporter [ <i>Arabidopsis thaliana</i> ]              |
| Traes_7AS_DE627AE1C.1 | --                          | 2.5143                      | 1.1254                      | Probable nitrite transporter [ <i>Arabidopsis thaliana</i> ]                      |
| Traes_2BL_B4193BAEF.2 | 1.9047                      | 1.1788                      | -1.6389                     | Peptide transporter PTR5 [ <i>Arabidopsis thaliana</i> ]                          |
| Traes_6DL_CBDD44DA9.1 | 2.9182                      | 3.8598                      | 2.2478                      | Peptide transporter PTR2 [ <i>Arabidopsis thaliana</i> ]                          |
| Traes_6DL_6EC763C47.1 | 2.3919                      | 10.5579                     | 8.4553                      | Peptide transporter PTR2 [ <i>Arabidopsis thaliana</i> ]                          |
| Traes_2BL_54FA866FD.1 | --                          | 2.29                        | --                          | Amino acid permease 6 [ <i>Arabidopsis thaliana</i> ]                             |
| Traes_3AS_5379B266E.1 | --                          | 1.3171                      | --                          | Amino acid permease 3 [ <i>Arabidopsis thaliana</i> ]                             |
| Traes_1DL_F70395059.1 | --                          | 2.015                       | 1.6046                      | auxin influx carrier (AUX1 LAX family) [ <i>Oryza sativa</i> subsp. japonica]     |
| Traes_7DS_A92314B8C.3 | 3.7952                      | 10.0454                     | 10.3063                     | Aquaporin NIP1-1 [ <i>Oryza sativa</i> subsp. Japonica]                           |
| Traes_4DL_AB2084483.2 | 10.3512                     | 2.1048                      | 2.6638                      | Pleiotropic drug resistance protein [ <i>Nicotiana plumbaginifolia</i> ]          |
| Traes_7DL_AEAE90568.1 | 3.3287                      | 1.7262                      | --                          | pleiotropic drug resistance protein 2 [ <i>Oryza sativa</i> subsp. Japonica]      |
